# Supplementary material for: Production of Polyhydroxybutyrate by Genetically Modified Pseudomonas sp. phDV1: A Comparative Study of Utilizing Wine Industry Waste as a Carbon Source
Source: MDPI journal article supplement (doi:10.3390/microorganisms11061592), 2023-06-15
Supplement: s1 [file s1]

## Supplementary Materials

**Table S1:** *Pseudomonas* sp. phDV1 strains used in this study.

| Strains                      | Features                                                     | Reference |
|------------------------------|--------------------------------------------------------------|-----------|
| <i>Pseudomonas</i> sp. phDV1 | Wild-type                                                    | [9,32,33] |
| $\Delta$ phaZ                | <i>Pseudomonas</i> sp. phDV1 $\Delta$ phaZ::Kan <sup>r</sup> | This work |
| $\Delta$ phaR                | <i>Pseudomonas</i> sp. phDV1 $\Delta$ phaR::Kan <sup>r</sup> | This work |

**Table S2:** Plasmids used in this study.

| Plasmids             | Features                                                                                                               | Reference |
|----------------------|------------------------------------------------------------------------------------------------------------------------|-----------|
| pMiniT 2.0           | Blunt cloning plasmid                                                                                                  | NEB       |
| pMK-RedS             | pBBR1MCS derivative; <i>gam</i> , <i>bet</i> , and <i>exo</i> from pUCP18-RedS cloned into pBBR1MCS, Cam <sup>r</sup>  | [36]      |
| pMini- $\Delta$ PhaZ | pMiniT derivative, a kanamycin resistance cassette flanked by regions (~500-bp) upstream and downstream of <i>phaZ</i> | This work |
| pMini- $\Delta$ PhaR | pMiniT derivative, a kanamycin resistance cassette flanked by regions (~500-bp) upstream and downstream of <i>phaR</i> | This work |

**Table S3:** Oligonucleotides used in this study.

| Oligonucleotides | Sequence (5' → 3')      | Description                                                    |
|------------------|-------------------------|----------------------------------------------------------------|
| phaR-F           | CACGACCTGCAGGGCAGCAAC   | amplification of the linearized DNA fragment for $\Delta$ phaR |
| phaR-R           | TGCGTGACCCGCAGGCCTTC    |                                                                |
| phaZ-F           | ACGCCATGGGACTCCTGCTAC   | amplification of the linearized DNA fragment for $\Delta$ phaZ |
| phaZ-R           | GAGGTGCCAGGTCGGATCAGC   |                                                                |
| pMini-F          | ACCTGCCAACCAGCGAGAAC    | sequencing primers for pMiniT plasmid derivatives              |
| pMini-R          | TCAGGGTTATTGTCTCATGAGCG |                                                                |

**Table S4** The gradient of elution solvents.

| No | Time (min) | Solvent A | Solvent B |
|----|------------|-----------|-----------|
| 1  | 0.00       | 90.0      | 10.0      |
| 2  | 10.00      | 85.0      | 15.0      |
| 3  | 12.00      | 80.0      | 20.0      |
| 4  | 14.00      | 60.0      | 40.0      |
| 5  | 16.00      | 40.0      | 60.0      |
| 6  | 18.00      | 5.0       | 95.0      |
| 7  | 20.00      | 40.0      | 60.0      |

|   |       |      |      |
|---|-------|------|------|
| 8 | 22.00 | 75.0 | 25.0 |
| 9 | 23.00 | 90.0 | 10.0 |

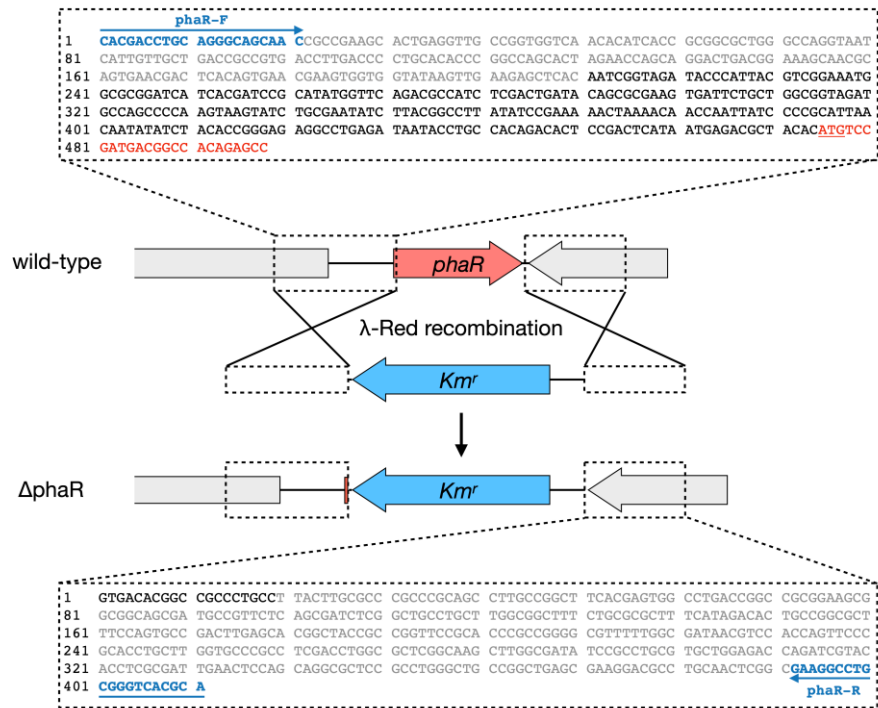

**FigureS1.** Schematic representation of the generation of  $\Delta$ phaR knockout mutants.

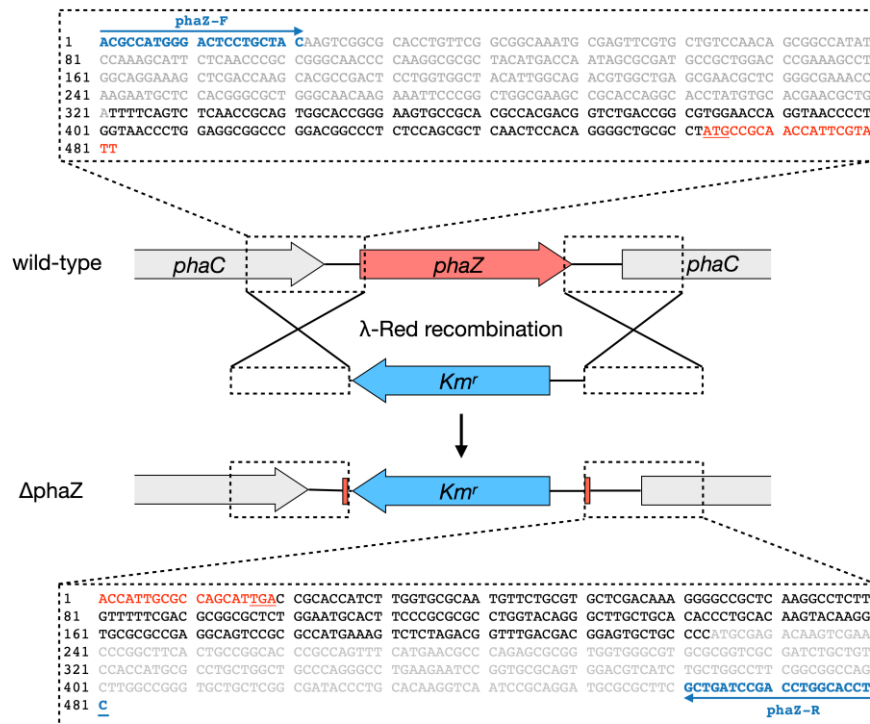

**Figure S2.** Schematic representation of the generation of  $\Delta$ phaZ knockout mutants.

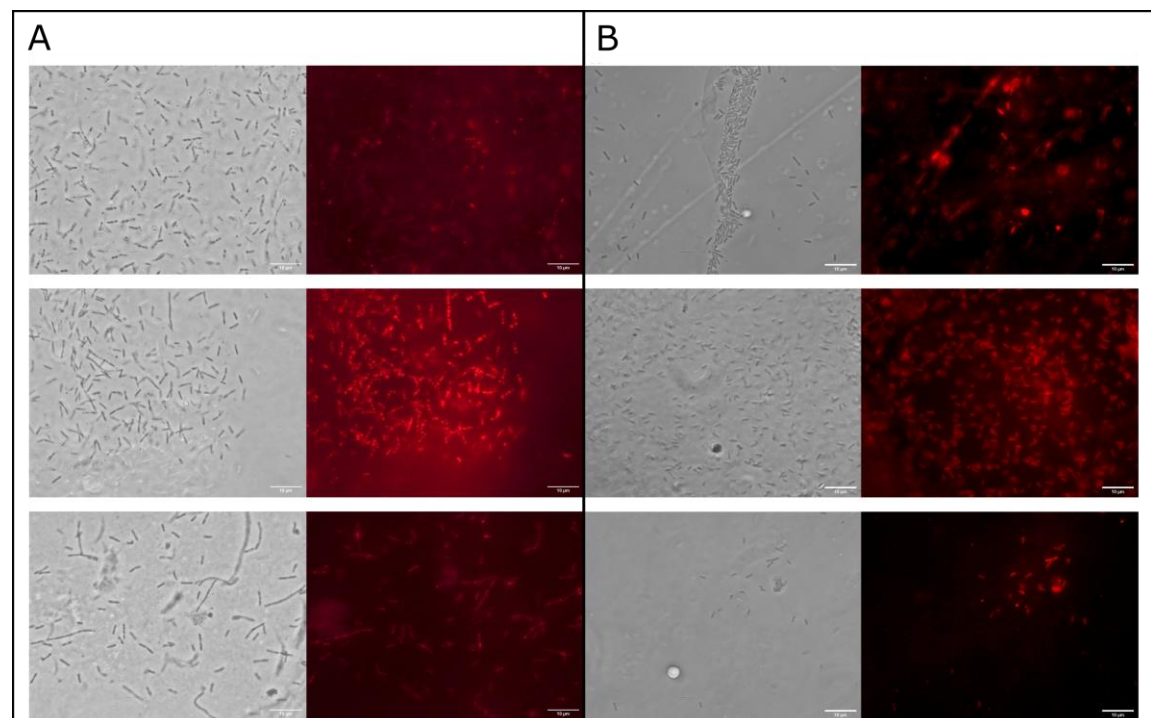

**Figure S3.** Accumulation of PHB in *Pseudomonas* sp. phDV1 strain and knockout mutants. Optical and fluorescence microscopy. (A) Upper-line *Pseudomonas* sp. phDV1 grown in GP extracts. Middle-line *Pseudomonas* sp. phDV1  $\Delta$ phaZ strain grown in GP extracts. Lower-line *Pseudomonas* sp. phDV1  $\Delta$ phaR strain grown in GP extracts. (B) Upper-line *Pseudomonas* sp. phDV1 grown in 4.5 mM phenol. Middle-line *Pseudomonas* sp. phDV1  $\Delta$ phaZ strain grown in 4.5 mM phenol. Lower-line *Pseudomonas* sp. phDV1  $\Delta$ phaR strain grown in 4.5 mM phenol.

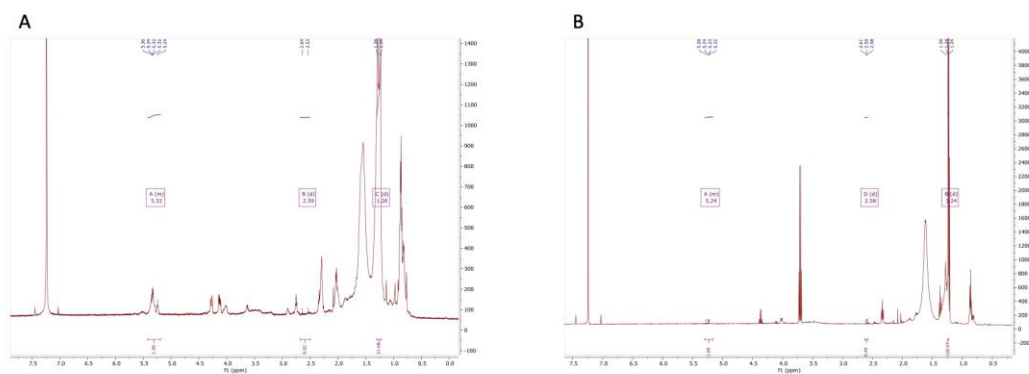

**FigureS4.**  $^1\text{H}$ NMR spectra of the isolated PHB granules from the *Pseudomonas* sp. pHDV1  $\Delta\text{phaZ}$  strain grown with 1% GP extracts (A) and 4.5 mM phenol (B).
